# Supplementary material
Source: PubMed Central journal article supplement (PMC3649677)
Supplement: supp_mst048_Chattopadhyay_et_al_SupplTables.pdf [file supp_mst048_Chattopadhyay_et_al_SupplTables.pdf]

**Supplementary Table 1. List of analyzed *E. coli* strains for the prototype core variome database.**

| <b>Strain</b>                        | <b>Origin</b> | <b>Syndrome</b>            | <b>Pathotype</b>            |
|--------------------------------------|---------------|----------------------------|-----------------------------|
| UTI89                                | Human         | Cystitis                   | Extraintestinal<br>(ExPEC)  |
| 536                                  |               | Pyelonephritis             |                             |
| CFT073                               |               | Pyelonephritis             |                             |
| IAI39                                |               | Urinary tract<br>infection |                             |
| UMN026                               |               | Urinary tract<br>infection |                             |
| S88                                  |               | Neonatal meningitis        |                             |
| <i>S. boydii</i> (Sb227)             |               | Diarrhea                   | <i>Shigella</i>             |
| <i>S. sonnei</i> (Ss046)             |               | Diarrhea                   |                             |
| <i>S. flexneri</i> (Sf_5a str. 8401) |               | Diarrhea                   |                             |
| <i>S. dysenteriae</i> (Sd197)        |               | Diarrhea                   |                             |
| 55989                                |               | Gastroenteritis            |                             |
| 042                                  | Diarrhea      |                            |                             |
| EDL933                               |               | Diarrhea                   | Enterohemorrhagic<br>(EHEC) |
| E2348/69                             |               | Diarrhea                   |                             |
| E24377A                              |               | Diarrhea                   | Enterotoxigenic<br>(ETEC)   |
| MG1655                               |               | Healthy                    | Non-clinical                |
| IAI1                                 |               | Healthy                    |                             |
| ATCC 8739                            |               | Healthy                    |                             |
| HS                                   |               | Healthy                    |                             |
| SE11                                 |               | Healthy                    |                             |
| Ed1a                                 |               | Healthy                    |                             |
| SECEC SMS-3-5                        |               | Environment                |                             |

**Supplementary Table 2. List of analyzed *S. enterica* strains for the prototype core variome database.**

| <b>Strain</b> | <b>Origin</b> | <b>Serovar</b> | <b>Pathotype</b> |
|---------------|---------------|----------------|------------------|
| LT2           | Human         | Typhimurium    | Enteric          |
| D23580        | Human         | Typhimurium    |                  |
| 14028S        | Chicken       | Typhimurium    |                  |
| P125109       | Human         | Enteritidis    |                  |
| SL476         | Human         | Heidelberg     |                  |
| SL483         | NA            | Agona          |                  |
| SL254         | NA            | Newport        |                  |
| CVM19633      | NA            | Schwarzengrund |                  |
| SC-B67        | Human         | Choleraesuis   | Systemic         |
| CT_02021853   | NA            | Dublin         |                  |
| SPB7          | Human         | Paratyphi B    |                  |
| 287/91        | Chicken       | Gallinarum     |                  |
| CT18          | Human         | Typhi          |                  |
| Ty2           | Human         | Typhi          |                  |
| ATCC 9150     | Human         | Paratyphi A    |                  |
| AKU_12601     | Human         | Paratyphi A    |                  |
| RKS4594       | Human         | Paratyphi C    |                  |

NA: information not available
